# Supplementary material for: Iodine-catalyzed oxidative cyclisation for the synthesis of sarisan analogues containing 1,3,4-oxadiazole as insecticidal agents
Source: Royal Society of Chemistry journal article supplement (doi:10.1039/c6ra22343e), 2016-01-01
Supplement: c6ra22343e1.pdf [file c6ra22343e1.pdf]

## Supporting Information

### **Iodine-Catalyzed Oxidative Cyclisation for the Synthesis of Sarisan Analogues Containing 1,3,4-Oxadiazole as Insecticidal Agents**

Yong Guo,\* Lailiang Qu, Xiaoguang Wang, Mengxing Huang, Lu Jia, Yanbing Zhang\*

*School of Pharmaceutical Sciences of Zhengzhou University and Collaborative Innovation Center of New Drug*

*Research and Safety Evaluation, Henan Province, No. 100, KeXue DaDao, Zhengzhou, 450001, PR China*

\*Corresponding authors: Tel. /fax: +86 371 67781912, e-mail: guoyong\_122@zzu.edu.cn; zhangyb@zzu.edu.cn.

### Spectra data for 8f-u

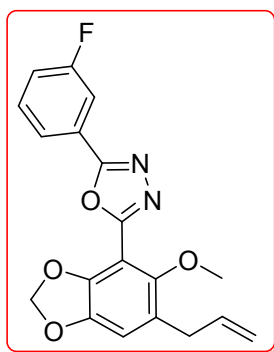

*Data for 8f*: White solid, yield: 68%, m.p. 151-153 °C; IR cm<sup>-1</sup> (KBr): 3077, 2974, 2921, 1639, 1473, 995, 933; <sup>1</sup>H NMR (400 MHz, CDCl<sub>3</sub>) δ: 7.94 (d, *J* = 8.0 Hz, 1H, -Ar), 7.82-7.85 (m, 1H, -Ar), 7.48-7.54 (m, 1H, -Ar), 7.22-7.28 (m, 1H, -Ar), 6.84 (s, 1H, H-6), 6.13 (s, 2H, -OCH<sub>2</sub>O-), 5.91-6.00 (m, 1H, H-2'), 5.09-5.14 (m, 2H, H-3'), 3.81 (s, 3H, -OCH<sub>3</sub>), 3.42 (d, *J* = 6.4 Hz, 2H, H-1'). <sup>13</sup>C NMR (100 MHz, CDCl<sub>3</sub>) δ: 164.1, 163.5, 161.6, 159.9, 150.1, 146.1, 144.4, 136.6, 130.9, 130.9, 126.7, 125.7, 122.8, 122.8, 118.9, 118.7, 116.4, 114.1, 113.9, 112.3, 102.4, 101.8, 62.6, 33.5. HRMS (ESI): Calcd for C<sub>19</sub>H<sub>16</sub>O<sub>4</sub>N<sub>2</sub>F ([M+H]<sup>+</sup>), 355.1089; Found, 355.1089.

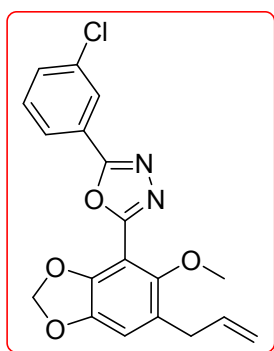

*Data for 8g*: White solid, yield: 84%, m.p. 115-116 °C; IR cm<sup>-1</sup> (KBr): 3080, 2941, 1640, 1479, 997, 926; <sup>1</sup>H NMR (400 MHz, CDCl<sub>3</sub>) δ: 8.13 (d, *J* = 1.6 Hz, 1H, -Ar), 8.03 (dt, *J* = 7.6, 1.6 Hz, 1H, -Ar), 7.45-7.54 (m, 2H, -Ar), 6.84 (s, 1H, H-6), 6.13 (s, 2H, -OCH<sub>2</sub>O-), 5.91-6.01 (m, 1H, H-2'), 5.09-5.14 (m, 2H, H-3'), 3.80 (s, 3H, -OCH<sub>3</sub>), 3.42 (d, *J* = 6.4 Hz, 2H, H-1'). <sup>13</sup>C NMR (100 MHz, CDCl<sub>3</sub>) δ: 163.4, 159.9, 150.1, 146.1, 144.4, 136.6, 135.2, 131.7, 130.4, 126.9, 126.7, 125.5, 125.1, 116.5, 112.3, 102.5, 101.7, 62.6, 33.5. HRMS (ESI): Calcd for C<sub>19</sub>H<sub>16</sub>O<sub>4</sub>N<sub>2</sub>Cl ([M+H]<sup>+</sup>), 371.0792; Found, 371.0793.

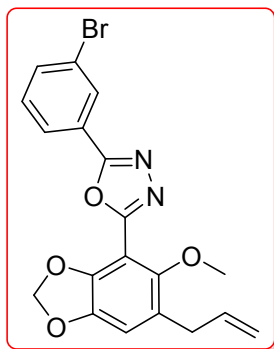

*Data for 8h*: White solid, yield: 69%, m.p. 119-120 °C; IR  $\text{cm}^{-1}$  (KBr): 3079, 2937, 1640, 1478, 996, 930;  $^1\text{H}$  NMR (400 MHz,  $\text{CDCl}_3$ )  $\delta$ : 8.28 (d,  $J = 2.0$  Hz, 1H, -Ar), 8.08 (d,  $J = 8.0$  Hz, 1H, -Ar), 7.69 (dt,  $J = 8.0, 0.8$  Hz, 1H, -Ar), 7.39 (t,  $J = 8.0$  Hz, 1H, -Ar), 6.84 (s, 1H, H-6), 6.13 (s, 2H,  $-\text{OCH}_2\text{O}-$ ), 5.91-6.01 (m, 1H, H-2'), 5.09-5.14 (m, 2H, H-3'), 3.80 (s, 3H,  $-\text{OCH}_3$ ), 3.42 (d,  $J = 6.4$  Hz, 2H, H-1').  $^{13}\text{C}$  NMR (100 MHz,  $\text{CDCl}_3$ )  $\delta$ : 163.3, 159.9, 150.1, 146.1, 144.4, 136.6, 134.7, 130.6, 129.8, 126.7, 125.7, 125.5, 123.1, 116.5, 112.3, 102.5, 101.7, 62.6, 33.5. HRMS (ESI): Calcd for  $\text{C}_{19}\text{H}_{16}\text{O}_4\text{N}_2\text{Br}$  ( $[\text{M}+\text{H}]^+$ ), 415.0287; Found, 415.0288.

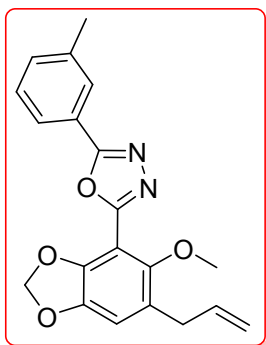

*Data for 8i*: White solid, yield: 81%, m.p. 105-106 °C; IR  $\text{cm}^{-1}$  (KBr): 3005, 2907, 2846, 1640, 1470, 993, 931;  $^1\text{H}$  NMR (400 MHz,  $\text{CDCl}_3$ )  $\delta$ : 7.98 (s, 1H, -Ar), 7.92 (d,  $J = 6.8$  Hz, 1H, -Ar), 7.35-7.43 (m, 2H, -Ar), 6.84 (s, 1H, H-6), 6.12 (s, 2H,  $-\text{OCH}_2\text{O}-$ ), 5.91-6.01 (m, 1H, H-2'), 5.09-5.14 (m, 2H, H-3'), 3.79 (s, 3H,  $-\text{OCH}_3$ ), 3.42 (d,  $J = 6.4$  Hz, 2H, H-1'), 2.45 (s, 3H,  $-\text{CH}_3$ ).  $^{13}\text{C}$  NMR (100 MHz,  $\text{CDCl}_3$ )  $\delta$ : 164.8, 159.4, 150.1, 146.0, 144.4, 138.9, 136.7, 132.5, 128.9, 127.5, 126.6, 124.2, 123.8, 116.4, 112.1, 102.4, 102.0, 62.6, 33.5, 21.3. HRMS (ESI): Calcd for  $\text{C}_{20}\text{H}_{19}\text{O}_4\text{N}_2$  ( $[\text{M}+\text{H}]^+$ ), 351.1338; Found, 351.1339.

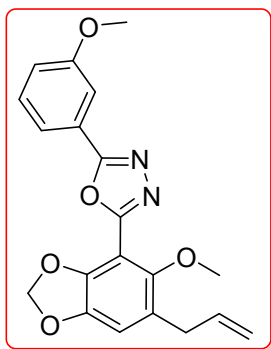

*Data for 8j*: White solid, yield: 30%, m.p. 93-94 °C; IR cm<sup>-1</sup> (KBr): 3003, 2976, 2944, 2841, 1630, 1476, 995, 928; <sup>1</sup>H NMR (400 MHz, CDCl<sub>3</sub>) δ: 7.69-7.73 (m, 2H, -Ar), 7.41 (t, *J* = 8.0 Hz, 1H, -Ar), 7.08 (t, *J* = 8.4, 2.4 Hz, 1H, -Ar), 6.83 (s, 1H, H-6), 6.12 (s, 2H, -OCH<sub>2</sub>O-), 5.91-6.01 (m, 1H, H-2'), 5.09-5.14 (m, 2H, H-3'), 3.90 (s, 3H, -OCH<sub>3</sub>), 3.81 (s, 3H, -OCH<sub>3</sub>), 3.42 (d, *J* = 6.4 Hz, 2H, H-1'). <sup>13</sup>C NMR (100 MHz, CDCl<sub>3</sub>) δ: 164.5, 160.0, 159.6, 150.1, 146.0, 144.4, 136.7, 130.2, 126.6, 125.0, 119.4, 118.1, 116.4, 112.1, 111.7, 102.4, 102.0, 62.6, 55.5, 33.5. HRMS (ESI): Calcd for C<sub>20</sub>H<sub>19</sub>O<sub>5</sub>N<sub>2</sub> ([M+H]<sup>+</sup>), 367.1288; Found, 367.1288.

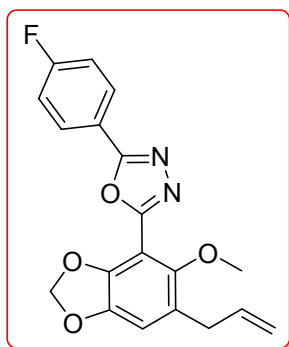

*Data for 8k*: Pale yellow solid, yield: 53%, m.p. 101-103 °C; IR cm<sup>-1</sup> (KBr): 3063, 2911, 1607, 1496, 1002, 925; <sup>1</sup>H NMR (400 MHz, CDCl<sub>3</sub>) δ: 8.13-8.17 (m, 2H, H-6), 7.20-7.26 (m, 2H, H-6), 6.84 (s, 1H, H-6), 6.12 (s, 2H, -OCH<sub>2</sub>O-), 5.91-6.01 (m, 1H, H-2'), 5.09-5.14 (m, 2H, H-3'), 3.80 (s, 3H, -OCH<sub>3</sub>), 3.42 (d, *J* = 6.4 Hz, 2H, H-1'). <sup>13</sup>C NMR (100 MHz, CDCl<sub>3</sub>) δ: 166.1, 163.8, 163.5, 159.6, 150.1, 146.0, 144.4, 136.6, 129.3, 129.2, 126.7, 120.3, 120.2, 116.5, 116.4, 116.3, 112.2, 102.4, 101.9, 62.5, 33.5. HRMS (ESI): Calcd for C<sub>19</sub>H<sub>16</sub>O<sub>4</sub>N<sub>2</sub>F ([M+H]<sup>+</sup>), 355.1087; Found, 355.1089.

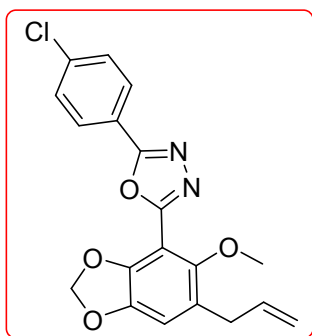

*Data for 8f*: White solid, yield: 83%, m.p. 111-113 °C; IR  $\text{cm}^{-1}$  (KBr): 3089, 3000, 2934, 1603, 1483, 994, 936;  $^1\text{H}$  NMR (400 MHz,  $\text{CDCl}_3$ )  $\delta$ : 8.07 (d,  $J = 8.4$  Hz, 2H, -Ar), 7.50 (d,  $J = 8.4$  Hz, 2H, -Ar), 6.84 (s, 1H, H-6), 6.12 (s, 2H, - $\text{OCH}_2\text{O}$ -), 5.91-6.01 (m, 1H, H-2'), 5.09-5.14 (m, 2H, H-3'), 3.79 (s, 3H, - $\text{OCH}_3$ ), 3.42 (d,  $J = 6.8$  Hz, 2H, H-1').  $^{13}\text{C}$  NMR (100 MHz,  $\text{CDCl}_3$ )  $\delta$ : 163.8, 159.7, 150.1, 146.0, 144.4, 138.0, 136.6, 129.4, 128.3, 126.7, 122.4, 116.4, 112.3, 102.4, 101.8, 62.6, 33.5. HRMS (ESI): Calcd for  $\text{C}_{19}\text{H}_{16}\text{O}_4\text{N}_2\text{Cl}$  ( $[\text{M}+\text{H}]^+$ ), 371.0800; Found, 371.0800.

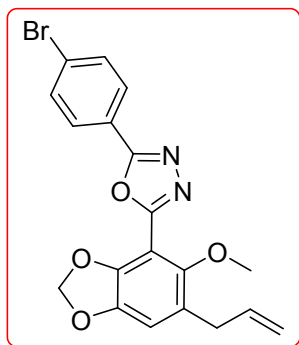

*Data for 8m*: White solid, yield: 51%, m.p. 128-129 °C; IR  $\text{cm}^{-1}$  (KBr): 3087, 3070, 2974, 2931, 1599, 1458, 993, 934;  $^1\text{H}$  NMR (400 MHz,  $\text{CDCl}_3$ )  $\delta$ : 8.00 (d,  $J = 8.4$  Hz, 2H, -Ar), 7.66 (d,  $J = 8.4$  Hz, 2H, -Ar), 6.84 (s, 1H, H-6), 6.12 (s, 2H, - $\text{OCH}_2\text{O}$ -), 5.91-6.01 (m, 1H, H-2'), 5.09-5.14 (m, 2H, H-3'), 3.79 (s, 3H, - $\text{OCH}_3$ ), 3.42 (d,  $J = 6.8$  Hz, 2H, H-1').  $^{13}\text{C}$  NMR (100 MHz,  $\text{CDCl}_3$ )  $\delta$ : 163.9, 159.7, 150.1, 146.0, 144.4, 136.6, 132.4, 128.4, 126.7, 126.4, 122.8, 116.4, 112.3, 102.4, 101.8, 62.6, 33.5. HRMS (ESI): Calcd for  $\text{C}_{19}\text{H}_{16}\text{O}_4\text{N}_2\text{Br}$  ( $[\text{M}+\text{H}]^+$ ), 415.0286; Found, 415.0288.

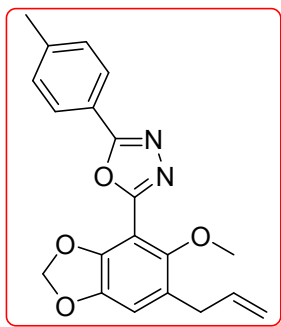

*Data for 8n*: White solid, yield: 55%, m.p. 113-114 °C; IR  $\text{cm}^{-1}$  (KBr): 3082, 3002, 2940, 2909, 1640, 1470, 993, 925;  $^1\text{H}$  NMR (400 MHz,  $\text{CDCl}_3$ )  $\delta$ : 8.02 (d,  $J = 8.0$  Hz, 2H, -Ar), 7.31 (d,  $J = 8.0$  Hz, 2H, -Ar), 7.18-7.20 (m, 1H, -Ar), 6.82 (s,

1H, H-6), 6.12 (s, 2H, -OCH<sub>2</sub>O-), 5.89-6.01 (m, 1H, H-2'), 5.09-5.13 (m, 2H, H-3'), 3.79 (s, 3H, -OCH<sub>3</sub>), 3.42 (d, *J* = 6.4 Hz, 2H, H-1'), 2.44 (s, 3H, -CH<sub>3</sub>). <sup>13</sup>C NMR (100 MHz, CDCl<sub>3</sub>)  $\delta$ : 164.7, 159.3, 150.1, 146.0, 144.4, 136.7, 129.7, 127.0, 126.6, 121.1, 116.4, 112.0, 102.4, 102.1, 62.5, 33.5, 21.6. HRMS (ESI): Calcd for C<sub>20</sub>H<sub>19</sub>O<sub>4</sub>N<sub>2</sub> ([M+H]<sup>+</sup>), 351.1340; Found, 351.1339.

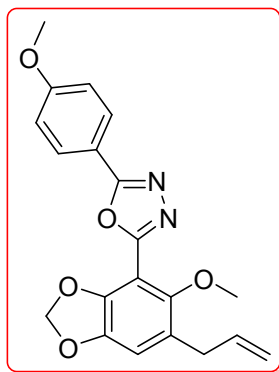

*Data for 8o*: White solid, yield: 70%, m.p. 123-124 °C; IR cm<sup>-1</sup> (KBr): 3068, 3004, 2981, 2948, 2902, 2845, 1612, 1497, 989, 949; <sup>1</sup>H NMR (400 MHz, CDCl<sub>3</sub>)  $\delta$ : 8.07 (d, *J* = 8.8 Hz, 2H, -Ar), 7.01 (d, *J* = 8.8 Hz, 2H, -Ar), 6.82 (s, 1H, H-6), 6.11 (s, 2H, -OCH<sub>2</sub>O-), 5.91-6.01 (m, 1H, H-2'), 5.09-5.13 (m, 2H, H-3'), 3.89 (s, 3H, -OCH<sub>3</sub>), 3.79 (s, 3H, -OCH<sub>3</sub>), 3.41 (d, *J* = 6.4 Hz, 2H, H-1'). <sup>13</sup>C NMR (100 MHz, CDCl<sub>3</sub>)  $\delta$ : 164.5, 162.3, 159.0, 150.1, 145.9, 144.4, 136.7, 128.8, 126.6, 116.4, 116.4, 114.5, 112.0, 102.3, 102.1, 62.5, 55.4, 33.5. HRMS (ESI): Calcd for C<sub>20</sub>H<sub>19</sub>O<sub>5</sub>N<sub>2</sub> ([M+H]<sup>+</sup>), 367.1288; Found, 367.1288.

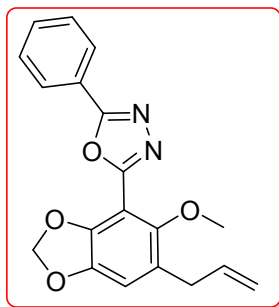

*Data for 8p*: White solid, yield: 89%, m.p. 76-78 °C; IR cm<sup>-1</sup> (KBr): 3006, 2976, 2905, 1640, 1532, 952, 936; <sup>1</sup>H NMR (400 MHz, CDCl<sub>3</sub>)  $\delta$ : 8.14-8.16 (m, 2H, -Ar), 7.52-7.56 (m, 3H, -Ar), 6.83 (s, 1H, H-6), 6.10 (s, 2H, -OCH<sub>2</sub>O-), 5.91-6.12 (m, 1H, H-2'), 5.09-5.14 (m, 2H, H-3'), 3.80 (s, 3H, -OCH<sub>3</sub>), 3.42 (d, *J* = 6.4 Hz, 2H, H-1'). <sup>13</sup>C NMR (100 MHz, CDCl<sub>3</sub>)  $\delta$ : 164.3, 159.5, 150.2, 146.0, 144.4, 136.6, 131.6, 129.0, 126.9, 126.5, 123.9, 116.4, 112.1, 105.0, 102.2, 62.6, 33.5. HRMS (ESI): Calcd for C<sub>19</sub>H<sub>17</sub>O<sub>4</sub>N<sub>2</sub> ([M+H]<sup>+</sup>), 337.1183; Found, 337.1183.

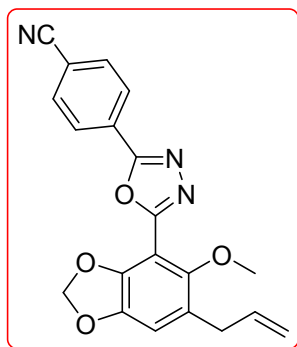

*Data for 8q*: Yellow solid, yield: 17%, m.p. 178-180 °C; IR  $\text{cm}^{-1}$  (KBr): 3077, 2980, 2947, 2225, 1631, 1468, 992, 935;  $^1\text{H}$  NMR (400 MHz,  $\text{CDCl}_3$ )  $\delta$ : 8.25 (d,  $J = 8.4$  Hz, 2H, -Ar), 7.82 (d,  $J = 8.4$  Hz, 2H, -Ar), 7.38-7.49 (m, 2H, -Ar), 6.86 (s, 1H, H-6), 6.13 (s, 2H,  $-\text{OCH}_2\text{O}-$ ), 5.91-5.99 (m, 1H, H-2'), 5.09-5.14 (m, 2H, H-3'), 3.81 (s, 3H,  $-\text{OCH}_3$ ), 3.42 (d,  $J = 6.8$  Hz, 2H, H-1').  $^{13}\text{C}$  NMR (100 MHz,  $\text{CDCl}_3$ )  $\delta$ : 163.0, 160.4, 150.1, 146.2, 144.5, 136.5, 132.9, 127.8, 127.4, 126.9, 117.9, 116.5, 115.2, 112.6, 102.5, 101.5, 62.6, 33.5. HRMS (ESI): Calcd for  $\text{C}_{20}\text{H}_{16}\text{O}_4\text{N}_3$  ( $[\text{M}+\text{H}]^+$ ), 362.1135; Found, 362.1135.

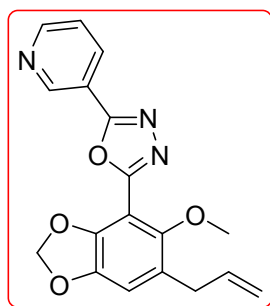

*Data for 8r*: White solid, yield: 29%, m.p. 125-126 °C; IR  $\text{cm}^{-1}$  (KBr): 3074, 2974, 2941, 2908, 1641, 1476, 983, 932;  $^1\text{H}$  NMR (400 MHz,  $\text{CDCl}_3$ )  $\delta$ : 9.36 (s, 1H, -Ar), 8.79 (d,  $J = 4.8$  Hz, 1H, -Ar), 8.46 (d,  $J = 8.0$  Hz, 1H, -Ar), 7.49-7.52 (m, 1H, -Ar), 6.86 (s, 1H, H-6), 6.13 (s, 2H,  $-\text{OCH}_2\text{O}-$ ), 5.91-6.01 (m, 1H, H-2'), 5.10-5.14 (m, 2H, H-3'), 3.82 (s, 3H,  $-\text{OCH}_3$ ), 3.42 (d,  $J = 6.4$  Hz, 2H, H-1').  $^{13}\text{C}$  NMR (100 MHz,  $\text{CDCl}_3$ )  $\delta$ : 162.3, 160.2, 152.1, 150.1, 147.7, 146.1, 144.5, 136.5, 134.5, 126.8, 123.9, 120.6, 116.5, 112.5, 102.5, 101.6, 62.6, 33.5. HRMS (ESI): Calcd for  $\text{C}_{18}\text{H}_{16}\text{O}_4\text{N}_3$  ( $[\text{M}+\text{H}]^+$ ), 338.1135; Found, 338.1135.

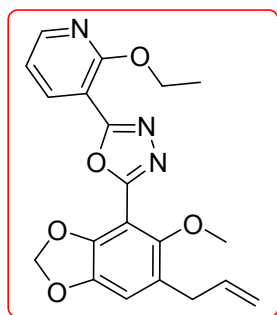

*Data for 8s*: Pale yellow solid, yield: 36%, m.p. 89-90 °C; IR  $\text{cm}^{-1}$  (KBr): 3004, 2980, 2940, 1630, 1469, 993, 920;  $^1\text{H}$

NMR (400 MHz, CDCl<sub>3</sub>)  $\delta$ : 8.32-8.36 (m, 2H, -Ar), 7.01 (d,  $J$  = 7.6 Hz, 1H, -Ar), 6.83 (s, 1H, H-6), 6.11 (s, 2H, -OCH<sub>2</sub>O-), 5.91-6.01 (m, 1H, H-2'), 5.09-5.13 (m, 2H, H-3'), 4.54 (q,  $J$  = 6.8 Hz, 2H, -CH<sub>2</sub>CH<sub>3</sub>), 3.81 (s, 3H, -OCH<sub>3</sub>), 3.41 (d,  $J$  = 6.4 Hz, 2H, H-1'), 1.44 (t,  $J$  = 7.2 Hz, 2H, -CH<sub>2</sub>CH<sub>3</sub>). <sup>13</sup>C NMR (100 MHz, CDCl<sub>3</sub>)  $\delta$ : 162.4, 160.7, 159.8, 150.3, 150.1, 146.0, 144.3, 139.4, 136.7, 126.7, 116.5, 116.4, 112.1, 107.9, 102.3, 102.1, 62.7, 62.6, 33.5, 14.5. HRMS (ESI): Calcd for C<sub>20</sub>H<sub>20</sub>O<sub>5</sub>N<sub>3</sub> ([M+H]<sup>+</sup>), 382.1396; Found, 382.1397.

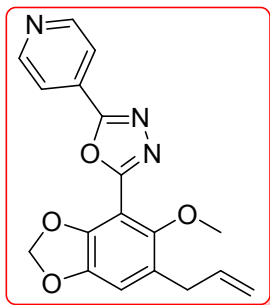

Data for **8t**: White solid, yield: 20%, m.p. 125-127 °C; IR cm<sup>-1</sup> (KBr): 3002, 2973, 2935, 1643, 1460, 991, 927; <sup>1</sup>H NMR (400 MHz, CDCl<sub>3</sub>)  $\delta$ : 8.84 (d,  $J$  = 5.2 Hz, 2H, -Ar), 8.01 (d,  $J$  = 6.0 Hz, 1H, -Ar), 7.49-7.52 (m, 1H, -Ar), 6.87 (s, 1H, H-6), 6.14 (s, 2H, -OCH<sub>2</sub>O-), 5.91-6.01 (m, 1H, H-2'), 5.10-5.14 (m, 2H, H-3'), 3.81 (s, 3H, -OCH<sub>3</sub>), 3.42 (d,  $J$  = 6.4 Hz, 2H, H-1'). <sup>13</sup>C NMR (100 MHz, CDCl<sub>3</sub>)  $\delta$ : 162.6, 160.6, 150.6, 150.2, 146.2, 144.5, 136.5, 131.2, 126.9, 120.5, 116.5, 112.7, 102.5, 101.5, 62.6, 33.5. HRMS (ESI): Calcd for C<sub>18</sub>H<sub>16</sub>O<sub>4</sub>N<sub>3</sub> ([M+H]<sup>+</sup>), 338.1135; Found, 338.1135.

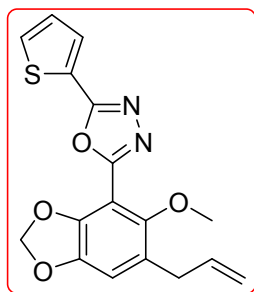

Data for **8u**: White solid, yield: 58%, m.p. 92-93 °C; IR cm<sup>-1</sup> (KBr): 3119, 2976, 2943, 1639, 1497, 997, 923; <sup>1</sup>H NMR (400 MHz, CDCl<sub>3</sub>)  $\delta$ : 7.84 (dd,  $J$  = 3.6, 0.8 Hz, 1H, -Ar), 7.56 (dd,  $J$  = 4.8, 0.8 Hz, 1H, -Ar), 7.18-7.20 (m, 1H, -Ar), 6.82 (s, 1H, H-6), 6.11 (s, 2H, -OCH<sub>2</sub>O-), 5.91-6.01 (m, 1H, H-2'), 5.09-5.13 (m, 2H, H-3'), 3.79 (s, 3H, -OCH<sub>3</sub>), 3.41 (d,  $J$  = 6.4 Hz, 2H, H-1'). <sup>13</sup>C NMR (100 MHz, CDCl<sub>3</sub>)  $\delta$ : 160.9, 158.9, 150.1, 146.0, 144.4, 136.6, 130.2, 129.9, 128.2, 126.6, 125.2, 116.4, 112.2, 102.4, 101.8, 62.6, 33.5. HRMS (ESI): Calcd for C<sub>17</sub>H<sub>15</sub>O<sub>4</sub>N<sub>2</sub>S ([M+H]<sup>+</sup>), 343.0746; Found, 343.0747.
